# Supplementary material for: Intracerebral Transplantation of Autologous Mesenchymal Stem Cells Improves Functional Recovery in a Rat Model of Chronic Ischemic Stroke
Source: Research Square preprint supplement (doi:10.21203/rs.3.rs-3185803/v1), 2023-07-24
Supplement: Supplementary file 1 [file e7ee3958176ebe59e9fe5147.docx]

| **Description** | **Possible Score** | **Description of Score** |
| --- | --- | --- |
| Postural Signs | 0 | Symmetric forelimb extension when lifted by tail |
| 1 | Forelimb flexion only |
| 2 | Forelimb flexion and thorax twisting |
| Gait Dysfunction | 0 | Walking straight |
| 1 | Walking towards contralateral side |
| 2 | Alternate circling and walking straight |
| 3 | Alternate circling and walking towards paretic side |
| 4 | Circling and/or other gait disturbance |
| Response to Tail Pull | 0 | Symmetric movement |
| 1 | Asymmetric movement |
| Proprioceptive Forelimb Placement | 0 | Normal placing |
| 1 | Weak or delayed (<2s) placing of contralateral forelimb |
| 2 | Forelimb hanging |
| Resistance to Lateral Displacement | 0 | Normal symmetric resistance |
| 1 | Weakened resistance on paretic side |
| 2 | No resistance on paretic side |
| Wire Grasp Strength | 0 | Symmetric power |
| 1 | Asymmetric power |
| Grasping Reflex | 0 | Grasps stick when forepaw gently touched |
| 1 | No grasping |
| Spontaneous Activity | 0 | Normal or near normal exploratory and grooming behavior |
| 1 | Reduced locomotion and spontaneous limb movements |
| 2 | Responsive to stimuli only (tactile, auditory) |
| 3 | Immobile and unresponsive to stimuli and/or absent acoustic startle reflex |
| **Total** | **16** |  |
